# Supplementary material for: Evaluation of Surface Water Quality Using Various Indices for Heavy Metals in Sasolburg, South Africa
Source: MDPI journal article supplement (doi:10.3390/w14152375), 2022-07-31
Supplement: s1 [file s1]

Archive with 1 entries (1 files):
- water-1814307-supplementary.pdf
