# Supplementary material for: Evaluation of Surface Water Quality Using Various Indices for Heavy Metals in Sasolburg, South Africa
Source: MDPI journal article supplement (doi:10.3390/w14152375), 2022-07-31
Supplement: s1 [file s1 › water-1814307-supplementary.pdf]

# Supplementary material for

## Evaluation of Surface Water Quality Using Various Indices for Heavy Metals in Sasolburg, South Africa

Vuyo Moses Mollo <sup>1,2</sup>, Philiswa N. Nomngongo <sup>1,2,\*</sup> and James Ramontja <sup>1,\*</sup>

<sup>1</sup> Department of Chemical Sciences, University of Johannesburg, Doornfontein Campus, P.O. Box 17011,

Johannesburg 2028, South Africa; 201121921@student.uj.ac.za

<sup>2</sup> Department of Science and Innovation-National Research Foundation South African Research Chair

Initiative (DSI-NRF SARChI) in Nanotechnology for Water, University of Johannesburg, Doornfontein,

Johannesburg 2028, South Africa

\* Correspondence: pnnomngongo@uj.ac.za (P.N.N.); jamesr@uj.ac.za (J.R.)

### Section S1. Pollution Indices

#### 1.1 Modified heavy metal pollution index (m-HPI)

[1] specified a modified heavy metal pollution index (m-HPI) for improved evaluation of water quality for domestic use to improve the drawbacks of heavy metals pollution index and m-HPI is calculated as follows:

$$m - HPI = \sum_{i=1}^n m - HPI^i \quad (1)$$

where  $n$  is the number of metals that are evaluated and  $m-HPI^i$  is the modified heavy metal pollution index for the  $i$ th heavy metal, calculated as:

$$m - HPI^i = w_i Q_i \quad (2)$$

Where  $w_i$  is the relative weightage factor calculated as:

$$w_i = \frac{W_i}{\sum_{i=1}^n W_i} \quad (3)$$

Where  $W_i$  is the unit weighting factor calculated as:

$$W_i = \frac{1}{S_i} \quad (4)$$

$S_i$  is the maximum standard value of the  $i$ th heavy metal. Sub index  $Q_i$  for the  $i$ th heavy metal is quantified as:

$$Q_i = \frac{M_i - S_i}{S_i} \quad (5)$$

$M_i$  represents the analysed concentration of the  $i$ th heavy metal. Modified heavy metal index can be broken down into metals that meet the maximum allowable value or metals that do not meet the maximum allowable value. The previous m-HPI is referred to as the positive index (PI) and the latter as the negative index (NI) with  $U_L$  being the upper limit of PI. Therefore, water quality according to m-HPI may be grouped as shown in Table 1.

### ***1.2 Heavy metal evaluation index (HEI)***

HEI offers a description of water quality regarding heavy metal contamination. HEI is evaluated based on Maximum Allowable Concentration (MAC) using concentration of the metal of interest [1]:

$$HEI = \sum_{i=1}^n HEI^i \quad (6)$$

$HEI^i$  is the contamination index related to the  $i$ th heavy metal calculated as:

$$HEI^i = \frac{M_i}{H_{MAC}^i} \quad (7)$$

The MAC of the  $i$ th heavy metal is  $H_{mac}^i$ . To distinguish the various levels of contamination, this method divides water quality into three groups as seen in Table 1:

### ***1.3 Nemerow Index (NeI)***

This approach is a multifactorial and integrated technique, where the index is determined using [1]:

$$NeI = \left[ \frac{\{(M_i/S_i)_{average}^2 + (M_i/S_i)_{max}^2\}}{n} \right]^{\frac{1}{2}} \quad (8)$$

Where  $(M_i/S_i)_{average}$  is the mean value for all heavy metals of interest of a sample,  $(M_i/S_i)_{max}$  is the maximum value for all metals of interest evaluated in the sample, and  $n$  is the number of heavy metals evaluated. For water quality purposes the technique has for categories for classification (Table 1):

### ***1.4 Contamination factor (Cf)***

The assessment of contamination in surface water may be evaluated using the contamination factor (Cf). It is an essential technique for measuring contamination over time. Cf is a ratio computed by dividing the average concentration of each element by the reference value and is calculated as follows [2]:

$$Cf = \frac{C_{heavy\ metal}}{C_{background}} \quad (9)$$

$C_{heavy\ metal}$  is the concentration of the target metal analysed and  $C_{background}$  is the reference concentration of the permissible value. Cf quality classifications are listed in Table 1.

### ***1.5 Modified degree of contamination (m-C<sub>d</sub>)***

The purpose of m-C<sub>d</sub> is to provide an assessment on the overall contamination in surface water at a given study area [3] and the equation is given as follows:

$$m - C_d = \frac{(\sum_{i=1}^n cf)}{n} \quad (10)$$

Where  $n$  is the number of elements evaluated for the  $i$ th heavy metal and  $Cf$  is the sum of the contamination factor. For water quality statuses the m-C<sub>d</sub> is divided into categories (Table 1).

### ***1.6 Estimated daily intakes (EDI)***

The estimated daily intake (EDI) for this study was investigated. Study was conducted for adult men, adult women, and children using the following equation (11) [4]:

$$EDI = C \times E_F \times E_D \times F_{TR}/W_{AB} \times T_A \quad (11)$$

Where  $C$  is the concentration of the analysed heavy metal (mg/L) in surface water,  $E_F$  is the frequency of exposure (365 days/year),  $E_D$  is the duration of exposure (60 years for men, 67 years for women, and 12 years for children),  $F_{IR}$  is the surface water ingestion rate (2.0 L/day for adult men and women, 1.0 L/day for children),  $W_{AB}$  is the Average body weight (65 kg for men, 60 kg for women, 20 kg for children), and  $T_A$  is the average exposure time ( $E_F \times E_D$ ).

### ***1.7 Non-carcinogenic risk of water consumption (HQ)***

A hazard quotient (HQ) calculation was made in compliance with equation (12) to compute the potential non-cacinogenic risk values due to specific pollutants in the examined surface water [4]:

$$HQ = EDI/RfD_0 \quad (12)$$

Where HQ is the hazard quotient (unit-less), EDI is the estimated daily intake (mg/kg/bw/day), and RfD<sub>0</sub> is the oral reference dose value.

### ***1.8 Carcinogenic risk of water consumption (R)***

Potential carcinogenic risk values (R) of surface water was calculated using heavy metal concentrations analysed, and was determined using equation (13) [4]:

$$R = EDI \times SF \quad (13)$$

Where R is the carcinogenic risk value (unit-less), EDI is the estimated daily intake (mg/kg bw/day), and SF is the slope factor [(mg/kg bw/day)<sup>-1</sup>]. SF were available for As = 1.5 [(mg/kg bw/day)<sup>-1</sup>], Cr = 0.5 [(mg/kg bw/day)<sup>-1</sup>], Pb = 0.0085 [(mg/kg.bw/day)<sup>-1</sup>] [4].

### ***1.9 Weighted arithmetic Water Quality Index (WQI)***

Water quality for drinking purposes was determined with the weighted arithmetic method (WQI). The following formulae were used to calculate water quality rating [5]:

$$q_i = (C_i/S_i) \times 100 \quad (14)$$

Where q<sub>i</sub>, C<sub>i</sub>, and S<sub>i</sub> represent the quality rating scale, concentration of *i* parameter, and standard value of *i* parameter, respectively.

Relative weight was calculated by

$$w_i = 1/S_i \quad (15)$$

Where the standard value of the *i* parameter is inversely proportional to the relative weight.

The overall WQI is calculated according to the following expression:

$$WQI = \sum q_i w_i / \sum w_i \quad (16)$$

WQI quality classifications are found in Table 1.

Table S1: Quality status for environmental and health parameters

| Indices                | Value                                       | Quality status                            | References |
|------------------------|---------------------------------------------|-------------------------------------------|------------|
| <b>m-HPI</b>           | $-1 \leq NI \leq 0$ and $PI = 0$            | Excellent                                 | [1]        |
|                        | $-1 < NI < 0$ and $0 < PI \leq U_L/2$       | Very good                                 |            |
|                        | $-1 \leq NI \leq 0$ and $U_L < PI \leq U_L$ | Good                                      |            |
|                        | $NI \leq 0$ and $PI > U_L$                  | Unacceptable                              |            |
| <b>HEI</b>             | $HEI < 10$                                  | Low                                       | [1]        |
|                        | $HEI = 10 - 20$                             | Medium                                    |            |
|                        | $HEI > 20$                                  | High                                      |            |
| <b>NeI</b>             | $NeI < 1$                                   | Insignificant contaminated                | [1]        |
|                        | $1 \leq NeI < 2.5$                          | Slightly contaminated                     |            |
|                        | $2.5 \leq NeI < 7$                          | Moderately contaminated                   |            |
|                        | $NeI \geq 7$                                | Heavily contaminated                      |            |
| <b>Cf</b>              | $Cf < 1$                                    | Low Cf                                    | [3]        |
|                        | $1 \leq CF < 3$                             | Moderate Cf                               |            |
|                        | $3 \leq CF < 6$                             | Considerable Cf                           |            |
|                        | $CF \geq 6$                                 | Very high Cf                              |            |
| <b>m-C<sub>d</sub></b> | $m-C_d < 1.5$                               | Nil to a very low degree of contamination | [3]        |
|                        | $1.5 \leq m-C_d < 2$                        | Low degree of contamination               |            |
|                        | $2 \leq m-C_d < 4$                          | Moderate degree of contamination          |            |
|                        | $4 \leq m-C_d < 8$                          | High degree of contamination              |            |
|                        | $8 \leq m-C_d < 16$                         | Very high degree of contamination         |            |
|                        | $16 \leq m-C_d < 32$                        | Extremely high degree of contamination    |            |
|                        | $m-C_d \geq 32$                             | Ultra-high degree of contamination        |            |
| <b>WQI</b>             | $< 50$                                      | Excellent                                 | [5]        |
|                        | 50 - 100                                    | Good water                                |            |
|                        | 101 - 200                                   | Poor water                                |            |
|                        | 201 - 300                                   | Very poor water                           |            |
|                        | $> 300$                                     | Unsuitable for drinking                   |            |

## References

1. Kamali Maskooni, E., et al., *Use of heavy metal content and modified water quality index to assess groundwater quality in a semiarid area*. Water, 2020. **12**(4): p. 1115.
2. Shakeri, A., et al., *Assessment of trace elements contamination in surface sediments of the Bakhtegan lake, Iran*. Iranian Journal of Science and Technology (Sciences), 2014. **38**(1): p. 76-85.
3. Sivakumar, S., et al., *Assessment of heavy metal enrichment and the degree of contamination in coastal sediment from South East Coast of Tamilnadu, India*. Journal of Heavy Metal Toxicity and Diseases, 2016. **1**(2): p. 11.
4. Janoska, O. and A. Gruszecka-Kosowska, *Water quality and human health risk assessment: a case study of the Czarna Przemsza River source in Zawiercie, Poland*. Human and Ecological Risk Assessment: An International Journal, 2020. **26**(3): p. 757-781.
5. Akter, T., et al., *Water Quality Index for measuring drinking water quality in rural Bangladesh: a cross-sectional study*. Journal of Health, Population and Nutrition, 2016. **35**(1): p. 1-12.
